# Supplementary material for: Effect of the combined addition of ultrasonicated kraft lignin and montmorillonite on hydroxypropyl methylcellulose bionanocomposites
Source: Royal Society of Chemistry journal article supplement (doi:10.1039/d3na00283g), 2023-01-01
Supplement: d3na00283g1.pdf [file d3na00283g1.pdf]

**SUPPORTING INFORMATION FOR:**

Effect of the combined addition of ultrasonicated  
kraft lignin and montmorillonite on hydroxypropyl  
methylcellulose bionanocomposites

*Raquel Martín-Sampedro<sup>1,2,3\*</sup>, Pilar Aranda<sup>1,3</sup>, Gustavo del Real<sup>2</sup>, Eduardo Ruiz-Hitzky<sup>1,3</sup>,  
Margarita Darder<sup>1,3</sup>*

<sup>1</sup> Materials Science Institute of Madrid (ICMM), CSIC, C/ Sor Juana Inés de la Cruz 3, 28049,  
Madrid, Spain

<sup>2</sup> National Institute of Agricultural and Food Research and Technology (INIA), CSIC, Ctra. de la  
Coruña, km 7.5. 28040, Madrid, Spain

<sup>3</sup> Interdisciplinary Platform for Sustainable Plastics towards a Circular Economy-Spanish  
National Research Council (SusPlast-CSIC), Madrid, Spain.

[\\*raquel.martin@inia.csic.es](mailto:*raquel.martin@inia.csic.es)

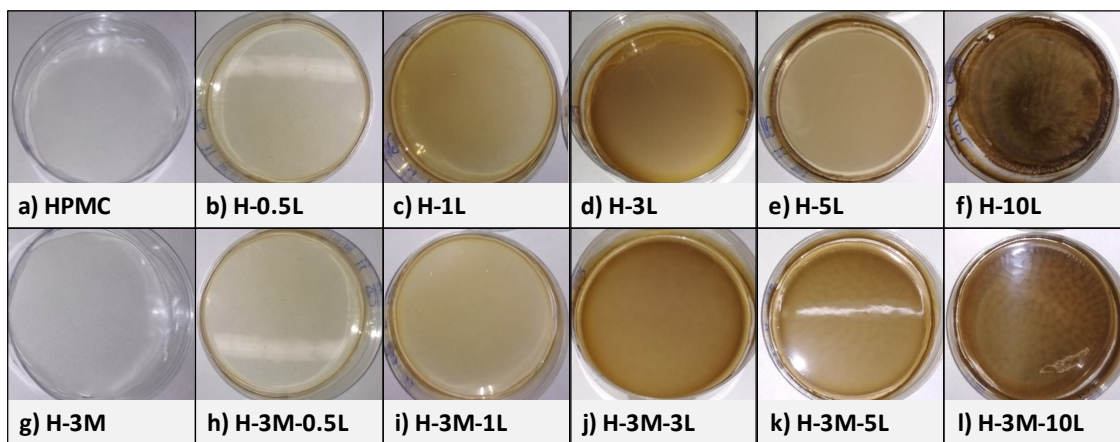

**Figure SI.1.** HPMC films without (a-f) and with (g-l) 3% montmorillonite and with different lignin content: 0% (a and g), 0.5% (b and h), 1% (c and i), 3% (d and j), 5% (e and k) and 10% (f and l).

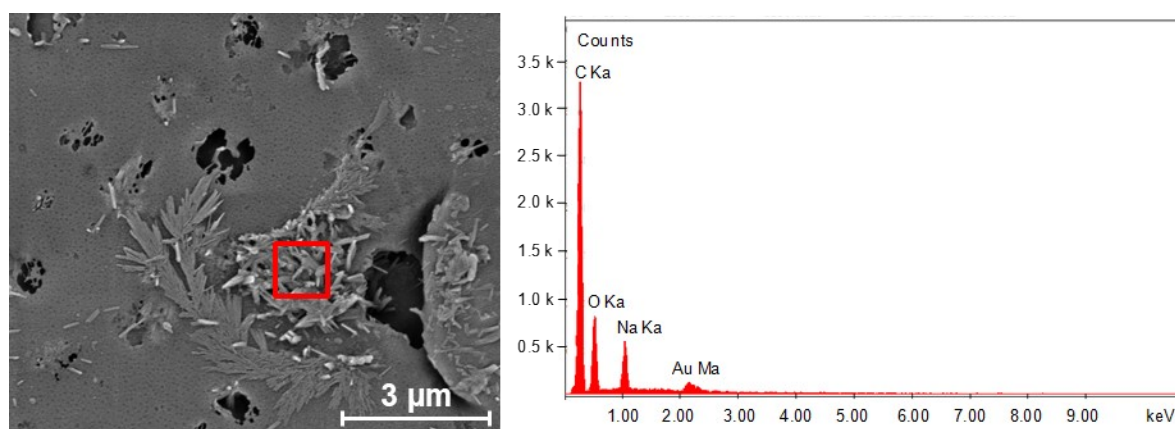

**Figure SI.2.** EDX analysis of staked rods observed in H-5L film (marked with a red square)

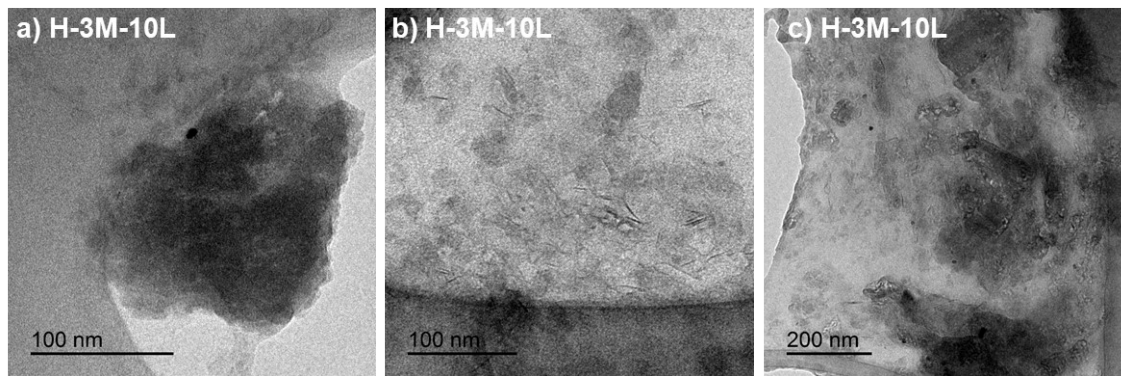

**Figure SI.3.** TEM images of HPMC films with 3% montmorillonite and 10% lignin.

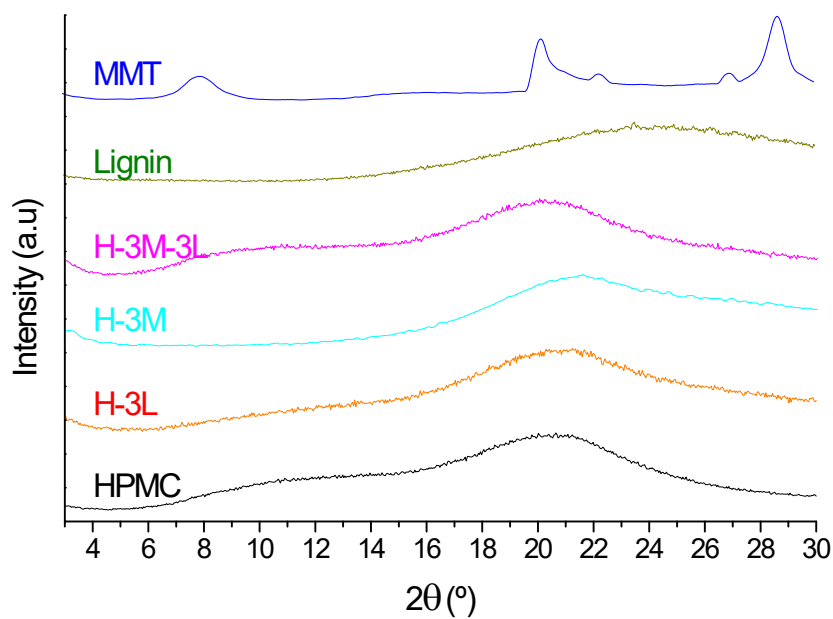

**Figure SI.4.** XRD patterns of montmorillonite (MMT), lignin and HPMC, H-3L, H-3M and H-3M-3L films.

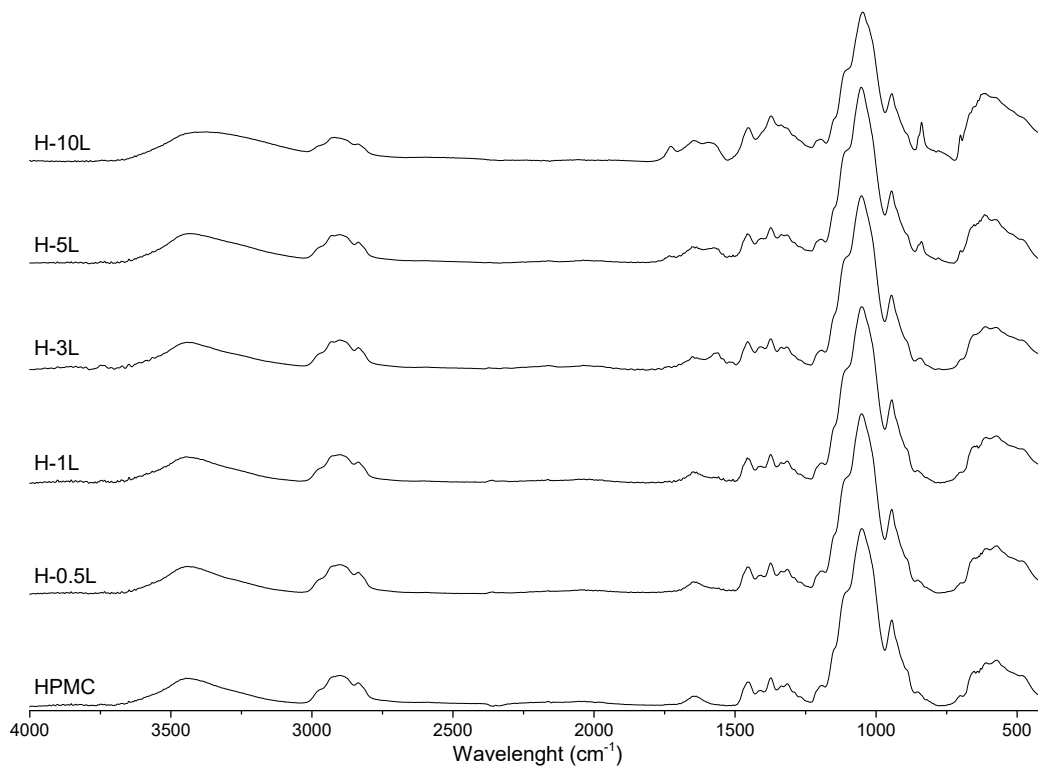

**Figure SI.5.** Fourier Transform Infrared (FTIR) spectra of HPMC without montmorillonite and with different lignin content (0-10%).

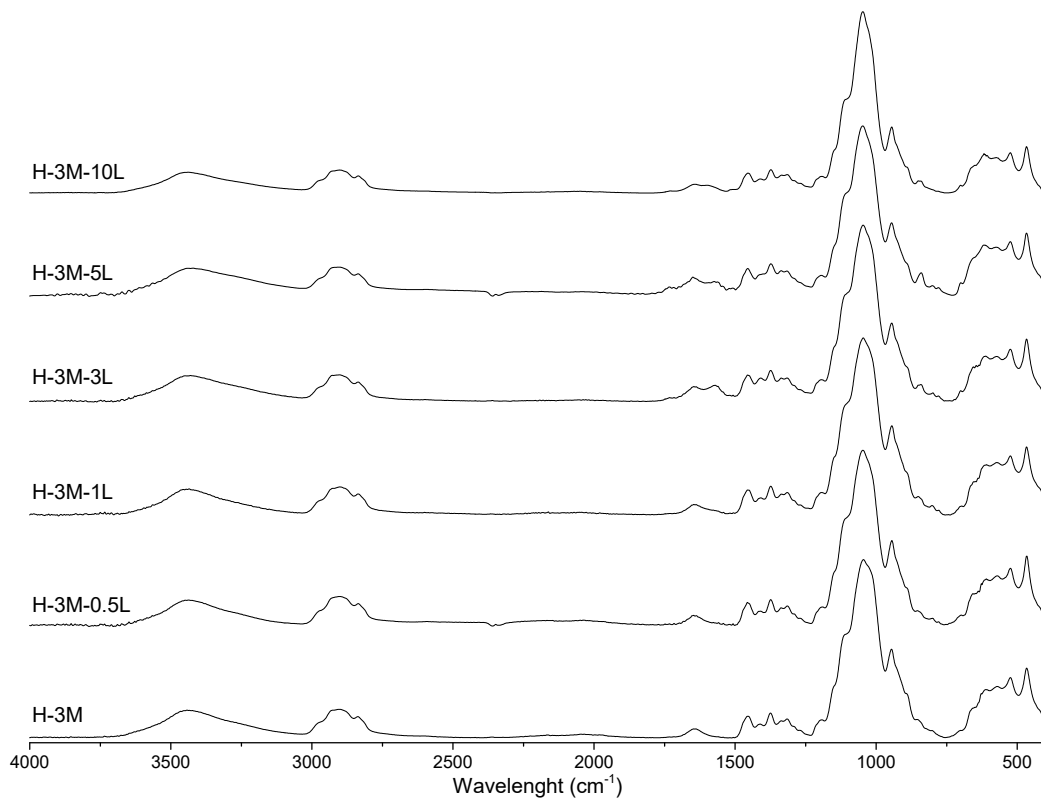

**Figure SI.6.** Fourier Transform Infrared (FTIR) spectra of HPMC film with 3% montmorillonite and with different lignin content (0-10%).

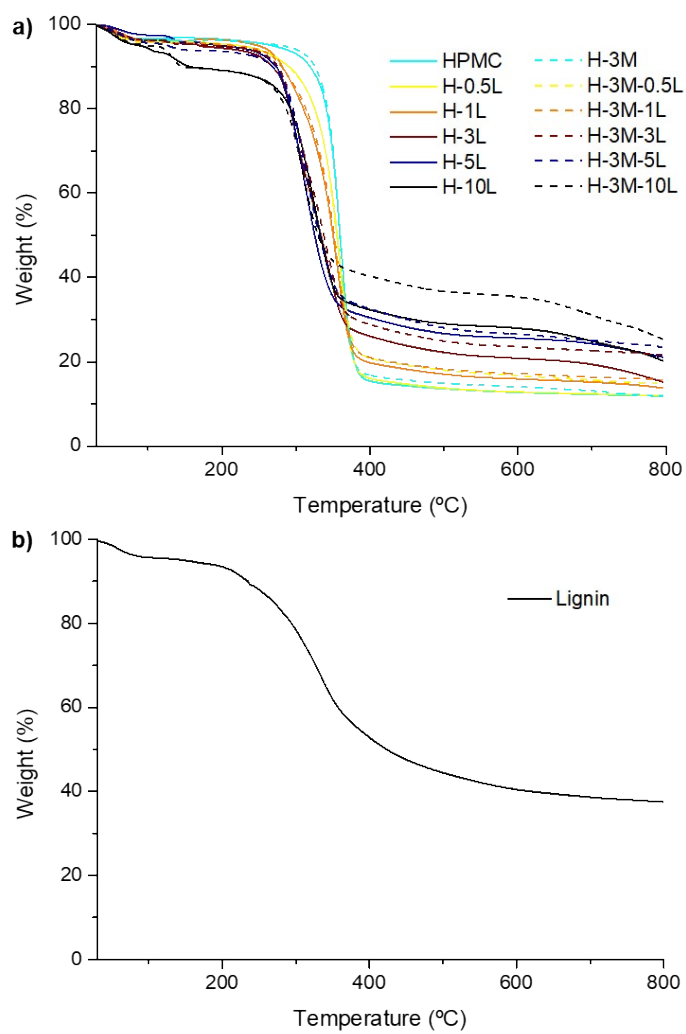

**Figure SI.7.** Thermogravimetric curves of a) the HPMC films without (continuous lines) and with montmorillonite (dash lines) and with different lignin content, and b) kraft lignin.

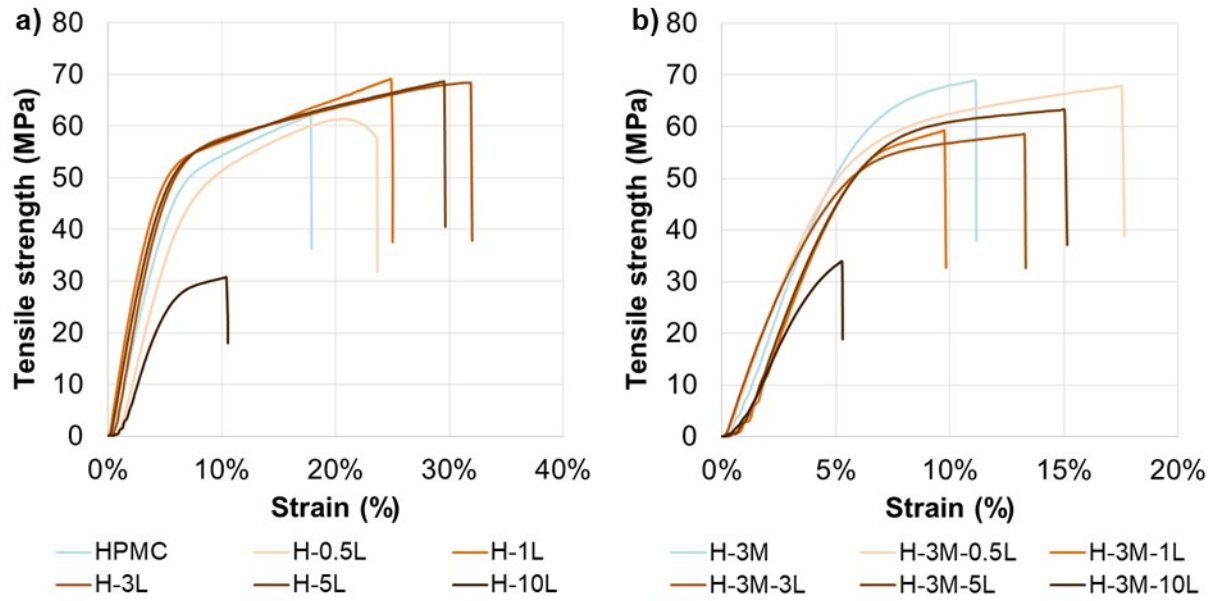

**Figure SI.8.** Stress-strain curves for bionanocomposite films a) without montmorillonite and b) with montmorillonite

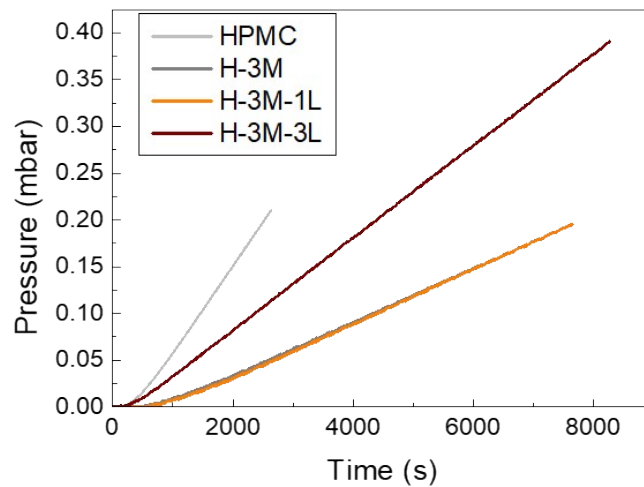

**Figure SI.9.** Evolution of the oxygen pressure in the low pressure chamber at 30°C across HPMC, H-3M, H-3M-1L and H-3M-3L samples.

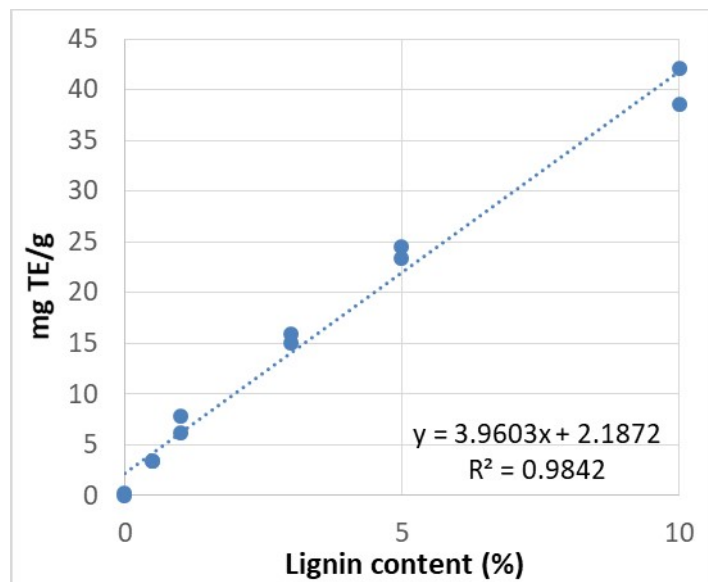

**Figure SI.10.** Linear relationship between antioxidant capacity and lignin content of the bionanocomposite films.



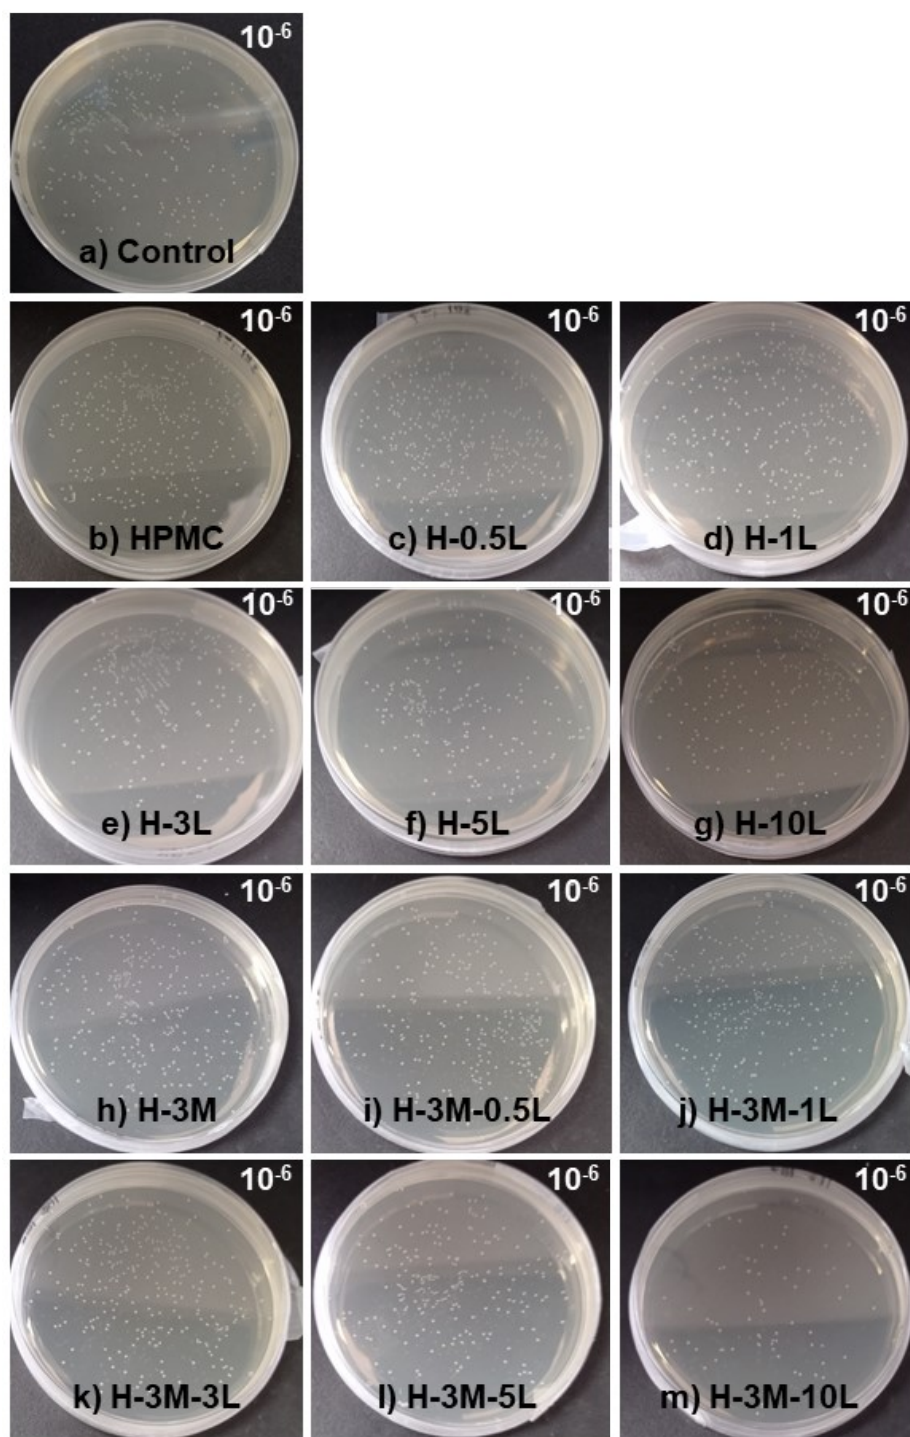

**Figure SI.11.** Photographs of the agar plates used for counting the number of *E. coli* colonies grown in the presence of each bionanocomposite film. Control sample without any film was also included, and indicated as control. All images correspond to  $10^{-5}$  dilutions of the corresponding cultures.

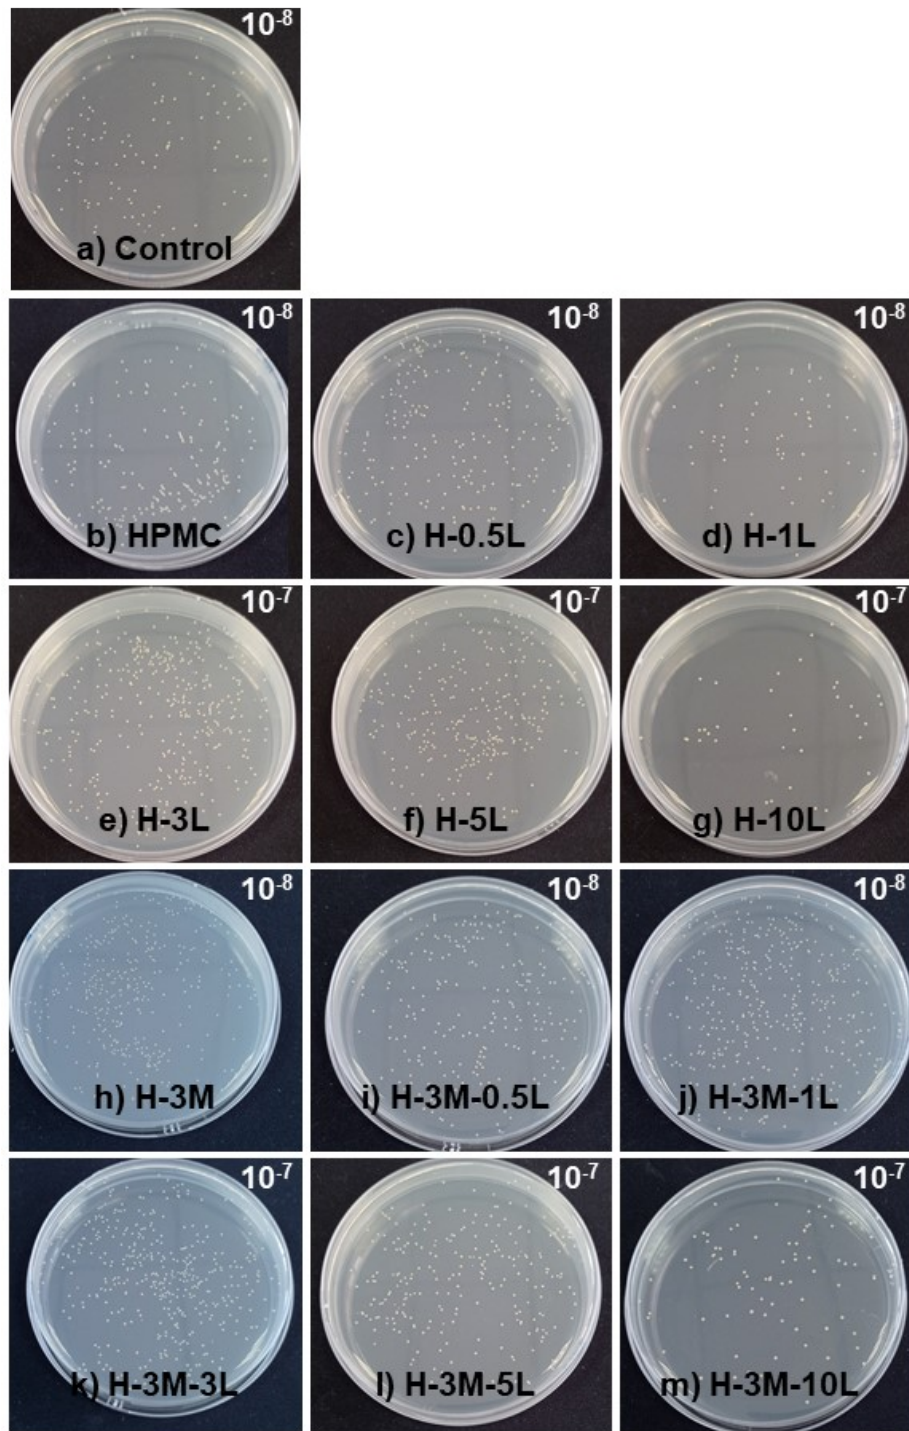

**Figure SI.12.** Photographs of the agar plates used for counting the number of *S. aureus* colonies grown in the presence of each bionanocomposite film. Control sample without any film was also included, and indicated as control. Images a-d and h-j correspond to  $10^{-8}$  dilutions, and e-g and k-m to  $10^{-7}$  dilutions of the corresponding cultures.
